# Supplementary material
Source: publisher site journal article supplement (https://static.cambridge.org/content/id/urn:cambridge.org:id:article:S1041610206003462/resource/name/Martin_M_Pinquart_appendix.doc)
Supplement: Supplementary file 1 [file Martin_M_Pinquart_appendix.doc]

# APPENDIX (for online publication only )

# Studies included in the meta-analysis

**Akkerman, R.L. and Ostwald, S.K.** (2001). *Managing anxiety in caregivers of persons diagnosed with Alzheimer’s disease: a group cognitive-behavioral intervention*. Paper presented at the 54th Annual Meeting of the Gerontological Society of America (GSA), Chicago, IL.b

**Askham, J. and Thompson, C.** (1990). *Dementia and home care*. London: Age Concern.d

**Bass, D.M., McClendon, M.J. and Brennan, P.F.** (1998). The buffering effect of a computer support network on caregiver strain. *Journal of Aging and Health*, 10, 20–43.d

**Bass, D.M., Clark, P.A. and Looman, W.J.** (2003). The Cleveland Alzheimer’s Managed Demonstration: outcomes after 12 months of implementation. *Gerontologist*, 43, 73–85.g2

**Beauschamp, N., Irvine, A.B., Seely, J. and Johnson, B.** (2005). Worksite-based internet multimedia program for family caregivers of persons with dementia. *The Gerontologist, 45*, 793–801.a

**Berger, G., Bernhardt, T., Schramm, U.,**  **Müller, R., Landsiedel-Andres, S. and Peters, J.** (2004). No effects of a combination of caregivers’ support group and memory training/music therapy in dementia patients from a memory clinic population. *International Journal of Geriatric Psychiatry*, 19, 223–31.g2

**Bougard, C.C.** (2003). *A program evaluation of the Caregiver Assistance Program*. Unpublished dissertation,Yeshiva University.a

**----------------------------------------------------------------------------------------------------------------------------------------**

**Key:** a = psychoeducational interventions; b = cognitive behavioural therapy; c =counselling/case work;

d = support; e = respite; f = training; g1 = multi-component/structured; g2 = multi-component/ unstructured; h = miscellaneous interventions

**Bourgeois, M.S., Schulz, R., Burgio, L. and Beach, S.** (2002). Skills-training for spouses of patients with Alzheimer’s disease: Outcomes of an intervention study. *Journal of Clinical Geropsychology*, 8, 53–73. a

**Brennan, P.F., Moore, S.M. and Smyth, K.A.** (1995). The effects of a special computer network on caregivers of persons with Alzheimer’s disease. *Nursing Research*, 44, 166–72. a

**Brodaty, H. and Gresham, M.** (1989). Effect of a training programme to reduce stress in carers of patients with dementia. *British Medical Journal*, 299, 1375–79. g1

**Brodaty, H., Roberts, K. and Peters, K.** (1994). Quasi-experimental evaluation of an educational model for dementia caregivers. *International Journal of Geriatric Psychiatry*, 9, 195–204. a

**Brodaty, H., Gresham, M. and Luscombe, G.** (1997). The Prince Henry Hospital dementia caregivers’ training programme. *International Journal of Geriatric Psychiatry*, 12, 183-192. g1

**Buchanan, J.** (2004). *Generalization of the effects of a cognitive-behavioral intervention for family* caregivers *of individuals with dementia*. (Dissertation) University of Reno, NV. a

**Buckwalter, K.C., Gerdner, L., Kohout, F., Hall, G.R., Kelly, A., Richards, B. and Sime, M**. (1999). A nursing intervention to decrease depression in family caregivers of persons with dementia. *Archives of Psychiatric Nursing*, 13, 80–88. a

**Burgener, S.C., Bakas, T. and Murray, C.** (1998). Effective caregiving approaches for patients with Alzheimer’s disease. *Geriatric Nursing*, 19, 121–26. a

**Burgio, L., Stevens, A., Guy, D., Roth, D.L. and Haley, W.E.** (2003). Impact of two psychosocial interventions on white and African American family caregivers of individuals with dementia. *Gerontologist*, 43, 568–79. a

**Burns, A.** *et al.*(2005). Brief psychotherapy in Alzheimer’s disease. *British Journal of Psychiatry,* 187, 143–47.h

**Chang, B.L.** (1999). Cognitive-behavioral intervention for homebound caregivers of persons with dementia. *Nursing Research*, 48, 173–82. b

**Challis, D., Abendorff, R.V. and Brown, P.** (1997). Care management and dementia: an evaluation of the Lewisham Intensive Case Management Scheme. In S. Hunter (Ed.), *Dementia: challenges and new directions*. Bristol, PA: Kingsley, pp. 139–60.h

**Chiverton, P. and Caine, E.D.** (1989). Education to assist spouses in coping with Alzheimer's disease: a controlled trial. *Journal of the American Geriatrics Society*, 37, 593–98. a

**Chu, P., Edwards, J., Levin, R. and Thompson, J.** (2000). The use of clinical case management for early stage Alzheimer’s patients and their families. *American Journal of Alzheimer’s disease and other dementias*, 15, 284–90. c

**Conlin, M.M., Caranasos, G.J. and Davidson, R.A.** (1992). Reduction of caregiver stress by respite care: a pilot study. *Southern Medical Journal*, 85, 1096–100. e

**Coon, D.W., Thompson, L., Steffen, A., Sorocco, K and Gallagher-Thompson, D.** (2003). Anger and depression management: psychoeducational skill-training interventions for women caregivers of a relative with dementia. *Gerontologist*, 43, 678–89. a, b

**Cucciare, M.** (2005).*Treatment utility of a prescriptive assessment for identifying dementia-caregiver service need*. Paper presented at the 58th Annual Meeting of the GSA, Orlando, FL. a

**Davis, L.L., Burgio, L.D., Buckwalter, K.C. and Weaver, M**. (2004). A comparison of in-home and telephone-based skill training interventions with caregivers of persons with dementia. *Journal of Mental Health and Aging,* 10, 31–44. a

**Done, D.J. and Thomas, J.A.** (2001). Training in communication skills for informal carers of people suffering from dementia: a cluster randomized clinical trial comparing a therapist-led workshop and a booklet. *International Journal of Geriatric Psychiatry*, 16, 816–21. a

**Dooley, N.R. and Hinojosa, J. (2004).** Improving quality of life for persons with Alzheimer’s disease and their family caregivers: brief occupational therapy intervention. *American Journal of Occupational Therapy*, 58, 561–69. h

**Dröes, R.M., Breebaart, E., Ettema, T.P., van Tilburg, W. and Mellenbergh, G.J.** (2000). Effect of integrated family support versus day care only on behavior and mood of patients with dementia. *International Psychogeriatrics*, 12, 99–115. g1

**Dröes, R.M., Breebaart, E., Meiland, F.J..** **van Tilburg, W. and Mellenbergh, G.J.** (2004). Effect of meeting centers support program on feelings of competence of family carers and delay of institutionalization. *Aging and Mental Health*, 8, 201–11. g1

**Dröes, R.M., Meiland, F., Schmitz, M. and van Tilburg, T.** (2004). Effects of combined support for people with dementia and carers versus regular day care on behavior and mood of persons with dementia. Results from a multi-centre implementation study. *International Journal of Geriatric Psychiatry*, 19, 673–84. g1

**Dube, C. and Vezina, J.** (2001). *The evaluation of a personalized phone call intervention conducted with family caregivers of individuals suffering from Alzheimer’s disease*. Paper presented at the 17th World Congress of the International Association of Gerontology, Vancouver. a

**Ducharme, F.** *et al.* (2005). Taking care of myself: efficacy of an intervention programme for caregivers of a relative with dementia living in a long-term care setting. *Dementia*, 4, 23–45. a

**Ducharme, F.** *et al.*  (2005) . Follow-up of an intervention program for caregivers of a relative with dementia living in a long-term care setting: are there any persistent and delayed effects? *Aging and Mental Health*, 9, 461–69. a

**Dziegielewski, S.F.** (1991). Social group work with the family member of elderly nursing home residents with dementia: a controlled evaluation. *Research in Social Work Practice*, 1, 358–70. a, d

**Eisdorfer, C.** *et al.* (2003). The effect of a family therapy and technology-based intervention on caregiver depression. *Gerontologist,* 43, 521–31. h, g, 1

**Eloniemi-Sulkava, U., Notkola, I.L. and Hentinen, M.** (2001). Effects of supporting community-living demented patients and their caregivers: A randomized trial. *Journal of the American Geriatrics Society*, 49, 1282-1287. d

**Farran, C.J. and Keane-Hagarty, E.** (1994). Multi-modal intervention strategies for caregivers of persons with dementia. In E. Light, G. Niederehe and B.D. Lebowitz (Eds.), *Stress Effects in Family Caregivers of Alzheimer’s Patients: Research and interventions*. New York: Springer, pp. 242–59. a

**Fink-Heinz, M. and Wilz, G.** (2005). *Haben betreute Urlaube für pflegende Angehörige von Demenzkranken eine gesundheitsfördernde Wirkung*? [Has vacation respite for dementia caregivers a health-promoting effect?]. Paper presented at the biennial meeting of section III of the German Association for Gerontology and Geriatrics, Mannheim, Germany.e

**Finkel, S.** (2005). *The E-care research project: a telephone-based intervention for caregivers of dementia patients*. Paper presented at the 12. Congress of the International Psychogeriatric Association, Stockholm, Sweden.g1

**Fung, W.Y. and Chien, W.T.** (2002). The effectiveness of a mutual support group for family caregivers of a relative with dementia. *Archives of Psychiatric Nursing*, 16, 134–44. d

**Gallagher-Thompson, D., Arean, P. and Rivera, P.** (2001). A psycho-educational intervention to reduce caregiver distress in Hispanic family caregivers: results of a pilot study. *Clinical Gerontologist*, 23, 17–32. a

**Gendron, C.E., Poitras, L.R., Engels, M.L. and Dastoor, D.P.** (1986). Skills-training with supporters of the demented. *Journal of the American Geriatrics Society*, 34, 875–80. a

**Gendron, C.E., Poitras, L., Dastoor, D.P. and Perodeau, G.** (1996). Cognitive-behavioral group intervention for spousal caregivers: findings and clinical considerations. *Clinical Gerontologist*, 17, 3–19. b

**Gerdner, L.A., Buckwalter, K.C. and Reed, D.** (2002). Impact of a psycho-educational intervention on caregiver response to behavioural problems. *Nursing Research*, 51, 363-374. a

**Gitlin, L.N., Belle, S.H. and Burgio, L.D.** (2003). Effects of multi-component interventions on caregiver burden and depression: The REACH multi-site initiative at 6-month follow-up. *Psychology and Aging*, 18, 361–74. a

**Gitlin, L.N., Cocoran, M., Winter, L., Boyce, A. and Hauck, W.W.** (2001). A randomized controlled trial of a home environmental intervention: effect on efficacy and upset in caregivers and on daily function of persons with dementia. *Gerontologist,* 41, 4–14. a

**Gitlin, L.N., Winter, L. and Corcoran, M.** (2003). Effects of the home environmental skill-building program on the caregiver-care recipient dyad: six-month outcomes from the Philadelphia REACH initiative. *Gerontologist,* 43, 532–46. a

**Gitlin, L.N., Hauck, W.W. and Dennis, M.P.** (2005). Maintenance of effects of the home environmental skill-building program for family caregivers and individuals with Alzheimer’s disease and related disorders. *Journal of Gerontology: Medical Sciences*, 60A, M368–M374. a

**Gonyea, J.G. and Silverstein, N.M.** (1991). The role of Alzheimer’s disease support groups in families’ utilization of community services. *Journal of Gerontological Social Work*, 16, 43–55. d

**Gormley, N., Lyons, D., and Howard, R.** (2001). Behavioural management of aggression in dementia: a randomized controlled trial. *Age and Ageing*, 30, 141–45. a

**Guttman, R.A.** (1991). *Adult day care for Alzheimer’s patients: Impact on family caregivers*. New York: Garland. e

**Haight, B.K., Bachman, D.L., Hendrix, S., Wagner, M.T., Meeks, A. and Johnson, J.** (2003). Life-review treating the dyadic family unit with dementia. *Clinical Psychology and Psychotherapy*, 10, 165–74. h

**Haley, W.H., Brown, S.L. and Levine, E.G.** (1987). Experimental evaluation of the effectiveness of group intervention for dementia caregivers. *Gerontologist,* 27, 376–82.a, d

**Hartiens, J.M.** (1995). *The impact of day-care respite on physical health, depression, and marital satisfaction in spousal caregivers of dementia victims*. (Unpublished dissertation), Fuller Theological Seminary, School of Psychology. Pasadena, CA.e

**Hebert, R., Leclerc, G., Bravo, G. and Girouard, D.** (1994). Efficacy of a support group programme for caregivers of demented patients in the community: a randomized controlled trial. *Archives of Gerontology and Geriatrics*, 18, 1–14. d

**Hebert, R., Levesque, L. and Vezina, J.** (2003). Efficacy of a psycho-educational group program for caregivers of demented persons living at home: a randomized controlled trial. *Journal of Gerontology: Social Sciences*, 58B, S58–S67. a

**Hepburn, K.W, Tornatore, J., Center, B. and Ostwald, S.W.** (2001). Dementia family caregiver training: affecting beliefs about caregiving and caregiver outcomes. *Journal of the American Geriatrics Society*, 49, 450–57. a

**Hinchliffe, A.C., Hyman, I.L. and Blizard, B.** (1995). Behavioral complications of dementia – can they be treated? *International Journal of Geriatric Psychiatry*, 10, 839–47. b

**Hoffman, J.T.** (1995). *Effects of services on family caregivers of dementia patients*. (Dissertation) Fuller Theological Seminar, Pasadena, CA.a

**Kahan, J., Kemp, B., Staples, F.R. and Brummel-Smith, B.** (1985). Decreasing the burden in families caring for a relative with dementing illness:a controlled study. *Journal of the American Geriatrics Society*, 33, 664–70. a

**King, A.C., Baumann, K., O’Sullivan, P., Wilcox, S. and Castro, C.** (2002). Effects of moderate-intensity exercise on physiological, behavioral and emotional responses to family caregiving: a randomized controlled trial. *Journal of Gerontology, Medical Sciences*, 57A, M26–M36. h

**King, A.C. and Brassington, G.** (1997). Enhancing physical and psychological functioning in older family caregivers: the role of regular physical activity. *Annals of Behavioral Medicine*, 19, 91–100. h

**Kosloski, K. and Montgomery, R.J.** (1993). The effects of respite on caregivers of Alzheimer’s patients: one-year evaluation of the Michigan Model Respite Programs. *Journal of Applied Gerontology*, 12, 4–17. e

**Kotler, D.L.** (1993). *The**impact of a psychoeducational support group on caregivers of patients with Alzheimer's**disease***.** (Unpublished dissertation) California School of Professional Psychology, Fresno, CA. a

**Lawton, M.P., Brody, E.M. and Saperstein, A.R.** (1989). A controlled study of respite service for caregivers of Alzheimer’s patients. *Gerontologist,* 29, 8–16. e

**Levin, E., Moriaty, J. and Gorbach, P.** (1994). *Better for a break*. London: HMSO.e

**Lewis, M.L., Hepburn, K. and Center, B. (2002)**. *Distress: a factor-analytically derived composite score of dementia-caregiving impact*. Paper presented at the 55th Annual Meeting of the GSA at Boston, MA. a

**LoGiudice, D., Waltrowicz, W., Brown, K. Burrows, C., Ames, D. and Flicker, L.** (1999). Do memory clinics improve the quality of life of carers? A randomized pilot trial. *International Journal of Geriatric Psychiatry*, 14, 626–32. f

**Logsdon, R., McCurry, S., Teri, L. and Hunter, P.** (2005). *Benefits of early-stage Alzheimer’s support groups*. Paper presented at the 58th Annual Meeting of the GSA, Orlando a

**Lorensini, S. and Bates, G.W.** (1997). The health, psychological and social consequences of caring for a person with dementia. *Australian Journal of Aging*, 16, 198–202. e

**Losada-Baltar, A., Izal-Fernández de Trocóniz, M. and Montorio-Cerrato, I.** (2004). Eficacia diferencial de dos intervenciones psicoeducativas para cuidadores de familares con demencia [Differential effects of psychosocial interventions for dementia caregivers]. *Revista de Neurologia*, 38, 701–08. b

**Losada I., Montorio, A., Losada A., Izal, M. and Marquez, M**. (2005). *Interventions for dementia caregivers: the importance of intervening in the dysfunctional thoughts about caregiving*. Paper presented at the 58th Annual Meeting of the GSA, Orlando, FL. a, b

**Mahoney, D.F., Tarlow, B.J. and Jones, R.N.** (2003). Effects of an automated telephone support system on caregiver burden and anxiety: findings from the REACH for TLC intervention study. *Gerontologist,* 43, 556–67. d

**Marriott, A., Donaldson, C., Tarrier, N. and Burns, A.** (2000). Effectiveness of cognitive-behavioural family intervention in reducing the burden of carers of patients with Alzheimer’s disease. *British Journal of Psychiatry*, 176, 557–62. b

**Martin-Cook, K., Davis, B.A., Hynan, L.S. and Weiner, M.F.** (2005).A randomized controlled study of an Alzheimer’s caregiver skills training program. *American Journal of Alzheimer’s Disease and Other Dementias,* 20, 204–210.a

**McCallion, P., Toseland, R.W. and Freeman, K.** (1999). An evaluation of a family- visit education program. *Journal of the American Geriatrics Society*, 47, 203–14. a

**McCurry, S.M., Logsdon, R.G., Vitiello, M.V. and Teri, L.** (1998). Successful behavioral treatment for reported sleep problems in elderly caregivers of dementia patients: a controlled study. *Journal of Gerontology: Psychological Sciences*, 53B, P122–29. a

**McCurry, S.M., Gibbons, L.E., Logsdon, R.G., Vitello, M. and Teri, L.** (2003). Training caregivers to change the sleep-hygiene practices of patients with dementia. The NITE-AD project. *Journal of the American Geriatrics Society*, 51, 1455–60. a

**McCurry, S.M., Gibbons, L.E., Logsdon, R.G., Vitello, M. and Teri, L.** (2005). Nighttime insomia treatment and education for Alzheimer’s disease: a randomized, controlled trial. *Journal of the American Geriatrics Society*, 53, 793–802. a

**Meier, D., Ermini-Fünfschilling, D., Monsch, A.U. and Strählin, H.B.** (1996). Kognitives Kompetenztraining mit Patienten im Anfangsstadium einer Demenz. *Zeitschrift für Gerontopsychologie*, 9, 207–17. f

**Meister, S., Zehle, H., Schacke, C. and Zank, S.** (2003). *Wirkung der gerontopsychiatrischen Tagespflege auf die pflegebedingte Belastung* [Effects of gerontopsychiatric daycare]. Poster presented at the biennial meeting of section III of the German Society of Gerontology and Geriatrics, Berlin, 2003.e

**Metitieri, T., Zanetti, O., Geroldi, C., Frisoni, G.B., DeLeon, D., Dello Buono, M**. *et al.*(2001). Reality-orientation therapy to delay outcomes of progression in patients with dementia. A retrospective study. *Clinical Rehabilitation*, 15, 471-478. f

**Miller, R., Newcomer, R. and Fox, P.** (1999). Effects of the Medicare Alzheimer’s Disease Demonstration on nursing home entry. *Health Services Research*, 34, 691–713. g2

**Mittelman, M.S., Ferris, S.H. and Shulman, E.** (1994). Efficacy of multi-component individualized treatment to improve the well-being of Alzheimer’s caregivers. In E. Light and G. Niederehe (Eds.), *Stress-effects on Family Caregivers of Alzheimer's Patients: Research and Interventions*. New York: Springer, pp. 156-184. g

**Mittelman, M.S., Ferris, S.H., Shulman, E. and Steinberg, G.** (1996). A family intervention to delay nursing home placement of patients with Alzheimer disease: a randomized trial. *Journal of the American Medical Association*, 276, 1725-1731. g1

**Mittelman, M.S., Ferris, S.H., Shulman, E. and Steinberg, G.** (1997). Effects of a multi-component support program on spouse-caregivers of Alzheimer’s disease patients: results of a treatment/control study. In L.L. Heston (Ed.), *Progress in Alzheimer’s Disease and Similar Conditions*. Washington, DC: American Psychiatric Press, pp. 259–75. g1

**Mittelman, M.S., Roth, D.L. and Coon, D.W.** (2004). Sustained benefit of supportive intervention for depressive symptoms in caregivers of patients with Alzheimer’s disease. *American Journal of Psychiatry*, 161, 850–56. g1

**Mohide, E.A., Pringle, D.M., Streiner, D.L. Gilbert, J. R., Muir, G. and Tew, M.** (1990). A randomized trial of family caregiver support in the home management of dementia. *Journal of the American Geriatrics Society*, 38, 446–54. e

**Moniz-Cook, E., Agar, S., Gibson, G. Win, T. and Wang, M.** (1998). A preliminary study of the effects of early intervention with people with dementia and their families in a memory clinic. *Aging and Mental Health*, 2, 119–211. g1

**Newcomer, R., Yordi, C., DuNah, R. Fox, P. and Wilkinson, A.** (1999). Effects of the Medicare Alzheimer’s disease demonstration on caregiver burden and depression. *Health Services Research*, 34, 669–89. g2

**Nobili, A., Riva, M., Tettamanti, M. Lucca, U., Lisco, M., Petrucci, B. and Porro**, **G.S.** (2004). The effect of a structured intervention on caregivers of patients with dementia and problem behaviors. *Alzheimer Disease and Associated Disorders*, 18, 75–82. a

**O’Connor, D.W., Pollitt, P.A., Brook, C.P. Reiss, B.B. and Roth, M.** (1991). Does early intervention reduce the number of elderly people with dementia admitted to institutions for long-term care? *British Medical Journal,* 302,871–875.g2

**Ostwald, S.K., Hepburn, K.W., Caron, W. Burns, T. and Mantell, R.** (1999). Reducing caregiver burden: a randomized psycho-educational intervention for caregivers of persons with dementia. *Gerontologist,* 39, 299–309. a

**Perkins, R.E. and Poynton, C.F.** (1999). Group counselling for relatives of hospitalized pre-senile dementia patients: a controlled study. *British Journal of Clinical Psychology*, 29, 287–95. c

**Quayhagen, M.P. and Quayhagen, M.** (1989). Differential effects of family-based strategies on Alzheimer’s disease. *Gerontologist,* 29, 150–55. f

**Quayhagen, M.P** *et al.* (2000). Coping with dementia: evaluation of four non-pharmacologic interventions. *International Psychogeriatrics*, 12, 249–65. a, c, e, f

**Quayhagen, M.P. and Quayhagen, M.** (2001). Testing of a cognitive stimulation intervention for dementia caregiver dyads. *Neuropsychological Rehabilitation*, 11, 319–32. f

**Riordan, J.M. and Bennett, A.V.** (1998). An evaluation of an augmented domiciliary service to older people with dementia and their carers. *Aging and Mental Health*, 2, 137–43. e

**Ripich, D.N., Ziol, E. and Lee, M.M.** (1999). Longitudinal effects of communication training on caregivers of persons with Alzheimer’s disease. *Clinical Gerontologist*, 19, 37–55. a

**Roberts, J.** *et al.* (1999). Problem-solving counseling for caregivers of the cognitively impaired: effective for whom? *Nursing Research*, 48, 162–72. c

**Robinson, K.M.** (1988). A social skills-training program for adult caregivers. *Advances in Nursing Sciences*, 10, 59–72. a

**Robinson, K.M. and Yates, K.** (1994). Effects of two caregiver-training programs on burden and attitude toward help. *Archives of Psychiatric Nursing*, 8, 312–19. a

**Schacke C.** (2002). Gerontopsychiatrische Tagespflege als Entlastungsmöglichkeit für die pflegenden Angehörigen der demenzkranken Patienten: eine Evaluationsstudie [The benefits of adult day care use for family caregivers assisting a relative with dementia: an evaluation]. *Zeitschrift für Verhaltenstherapie und Verhaltensmedizin*, 23, 227–43. e

**Schulz R.** (2005). *Clinical meaningfulness of interventions with caregivers*. Paper presented at the 12th congress of the International Psychogeriatric Association, Stockholm, Sweden.g1

**Senanarong, V.** *et al.* (2004). A counselling intervention for caregivers: effect on neuropsychiatric symptoms. *International Journal of Geriatric Psychiatry*, 19, 781-788. c

**Stanley, S.A.** (1989). *Impact of a formal education and group support program on the subjective well-being and burden perceptions of primary caregivers for adults with progressive dementia*. Unpublished Dissertation: Ohio State University.a, f

**Steffen, A.M.** (2000). Anger management for dementia caregivers: a preliminary study using video and telephone interviews. *Behavior Therapy*, 31, 281–99. a

**Steffen, A.M., Mensie, L., Palmer, M. and Grant J.** (2005). *Reducing distress in denemtia family caregivers through a distance-based intervention*. Paper presented at the 58th Annual Meeting of the GSA, Orlando, FL. a,

**Stolley, J.M, Reed, D. and Buckwalter, K.C.** (2002). Caregiver appraisal and interventions based on the progressively lowered threshold model. *American Journal of Alzheimer Disease and Other Dementias*, 17, 110–20.a

**Sutcliffe, C. and Larner, S.** (1988). Counselling carers of the elderly at home: a preliminary study. *British Journal of Clinical Psychology*, 27, 177–78. a

**Teri, L., Logsdon, R.G., Uomoto, J. and McCurry, S.M.** (1997). Behavioral treatment of depression in dementia patients: a controlled clinical trial. *Journal of Gerontology: Psychological Sciences*, 52B, P159–P166. a, b

**Teri, L.** *et al.* (2003). Exercise plus behavioral management in patients with Alzheimer Disease: a randomized controlled trial. *JAMA*, 290, 2015–022. g1

**Tibaldi, V.** *et al.*  (2004). A randomized controlled trial of home hospital intervention for frail elderly demented patients: behavioral disturbances and caregiver stress. *Archives of Gerontology and Geriatrics*, Suppl. 9, 431–36. c

**Toner, H.L.** (1987). Effectiveness of a written guide for carers of dementia sufferers. *British Journal of Clinical and Social Psychiatry*, 5, 24–26. a

**vanHout, H., Jansen, D. and van Merwijk, K.H.** (2005). *Randomized controlled trial of case-management by nurses of early dementia persons and their primary caregivers*. Paper presented at the 12th congress of the International Psychogeriatric Association, Stockholm.c

**Vedhara, K.** *et al.* (2003). Enhancement of antibody response to influenca vaccination in the elderly following a cognitive-behavioral stress management intervention. *Psychotherapy and Psychosomatics*, 72, 245–52. b

**Vernooij-Dassen, M.J.** (1993). *Dementie an thuiszorg: Een onderzoek naar determinanten van het compenentiegevoel van centrale verzorgers en het effect van professionele interventie* [Dementia and home care]. Amsterdam: Swets en Zeitlinger. e

**Wetterstein, A., König, M., Schmid, R. and Perren, S.** (2005). *Belastung und Wohlbefinden bei Angehörigen von Menschen mit Demenz: Eine Interventionsstudie* [Stress and well-being in caregivers of persons with dementia: An intervention study]. Zürich: Rüegger. a

**Wilz, G., Gunzelmann, T., Adler, C. and Brähler, E.** (1998). Gruppenprogramm für pflegende Angehörige von Demenzkranken [Group interventions for caregivers of demented elderly]. *Zeitschrift für Gerontopsychologie und –psychiatrie*, 11, 97–106. h

**Wimo, A., Mattsson, B., Adolfsson, R. Eriksson, T. and Nelvig, A.** (1993). Dementia day care and its effects on symptoms and institutionalization – a controlled Swedish study. *Scandinavian Journal of Primary Health Care*, 11, 117–23. e

**Woods, R.T., Wills, W. and Higginson, I.J.** (2003). Support in the community for people with dementia and their carers: a comparative outcome study of specialist mental health service interventions. *International Journal of Geriatic Psychiatry*, 18, 298–307. g2

**Wright, L.K., Litaker, M., Laraia, M.T. and DeAndrade, S.** (2001). Continuum of care for Alzheimer’s disease: a nursing education and counselling program. *Issues in Mental Health Nursing*, 22, 231–52. a

**Zanetti, O., Metitieri, T. and Bianchetti, A.** (1998). Effectiveness of an educational program for demented person’s relatives. *Archives of Gerontology and Geriatrics*, 6(Suppl.):531–38. a

**Zarit, S.H., Zarit, J.M. and Reever, K.E.** (1982). Memory training for severe memory loss: effects on senile dementia patients and their families. *Gerontologist,* 22, 373–377. f

**Zarit, S.H., Anthony, C.R. and Boutselis, M.** (1987). Interventions with caregivers of dementia patients: comparison of two approaches. *Psychology and Aging*, 2, 225-232. a, d

**Zarit, S.H., Stephens, A.P., Townsend, A. and Greene, R.** (1998). Stress reduction for family caregivers: effects of adult day-care use. *Journal of Gerontology: Social Sciences*, 53B, S267–77. e

**Zarit, S.H.** (2004). *Effects of adult day services for people with dementia and their family caregivers*. Paper presented at the 57th Annual meeting of the GSA, Washington, DC. e
